# Supplementary material for: LeCTR2, a CTR1-like protein kinase from tomato, plays a role in ethylene signalling, development and defence
Source: PubMed Central journal article supplement (PMC2440563; doi:10.1111/j.1365-313x.2008.03481.x), 2008-04-25
Supplement: tpj0054-1083-SD3.pdf [file tpj0054-1083-SD3.pdf]

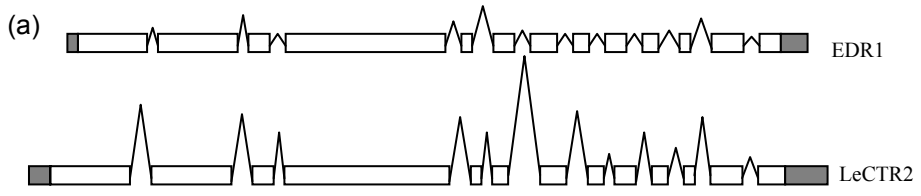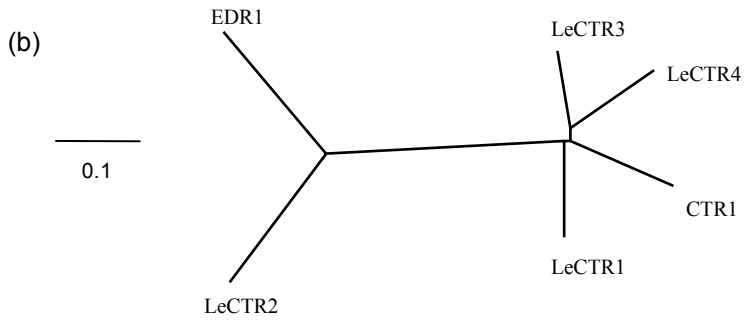

Supplementary Figure 1

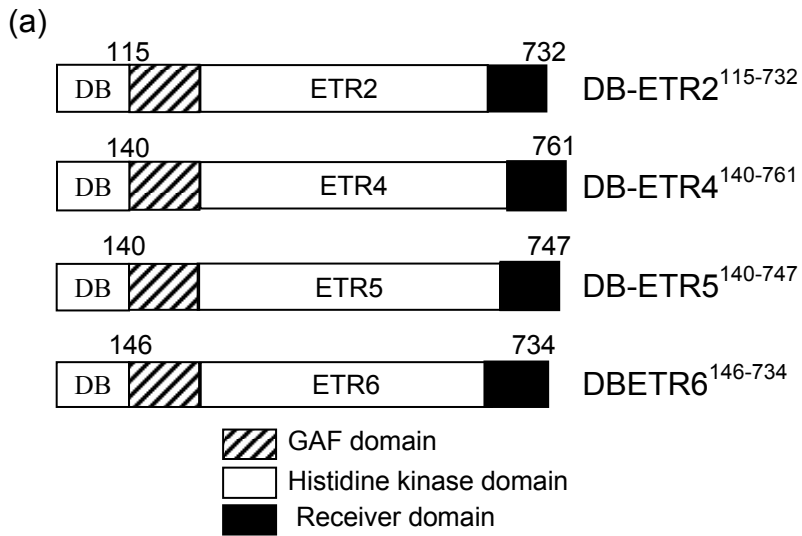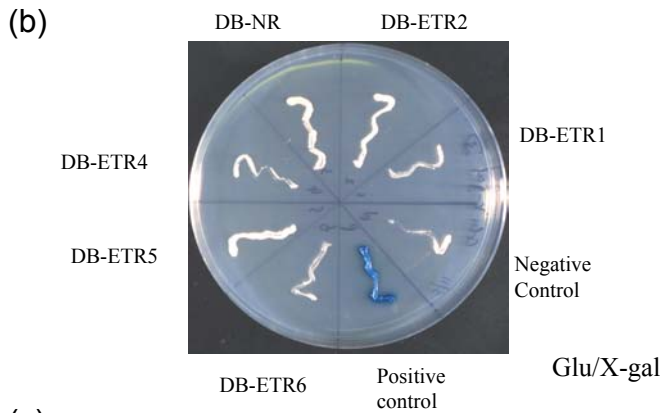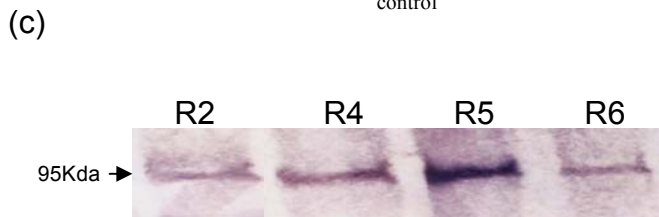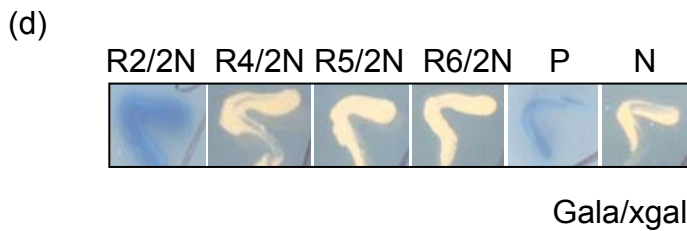

Supplementary Figure 2

(a)

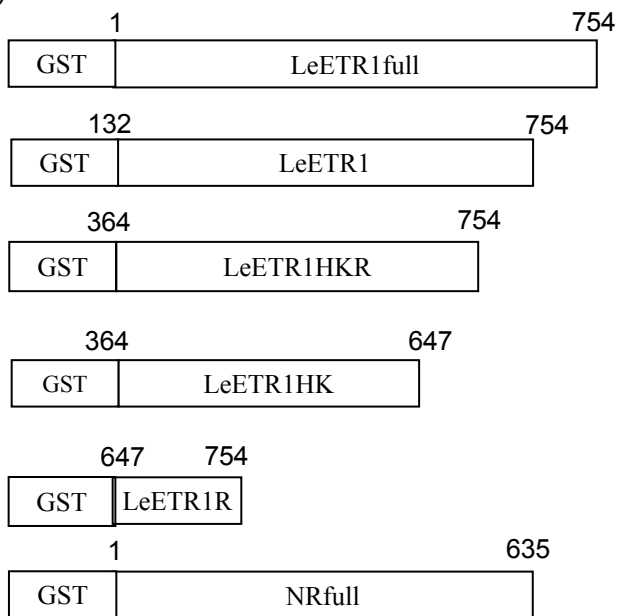

(b)

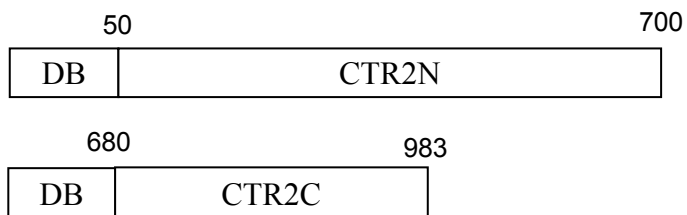

Supplementary Figure 3

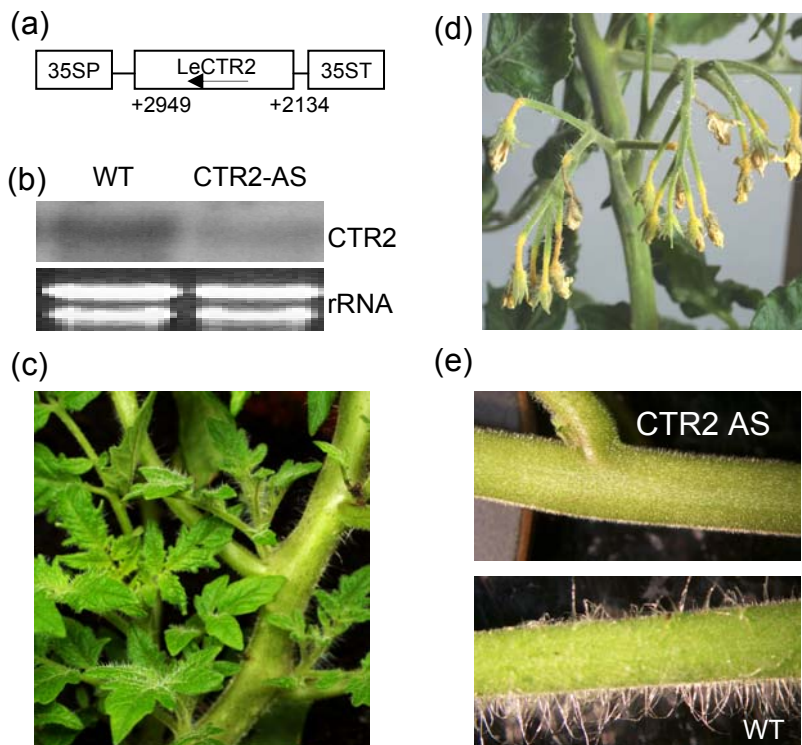

Supplementary Figure 4

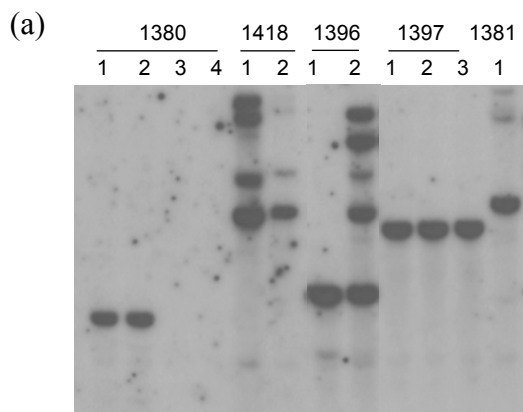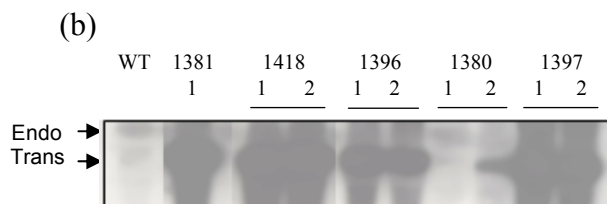

Supplementary Figure 5
